# Supplementary material for: A Smartphone App to Reduce Sugar-Sweetened Beverage Consumption Among Young Adults in Australian Remote Indigenous Communities: Design, Formative Evaluation and User-Testing
Source: PubMed Central journal article supplement (PMC5743922; doi:10.2196/mhealth.8651), 2017-12-12

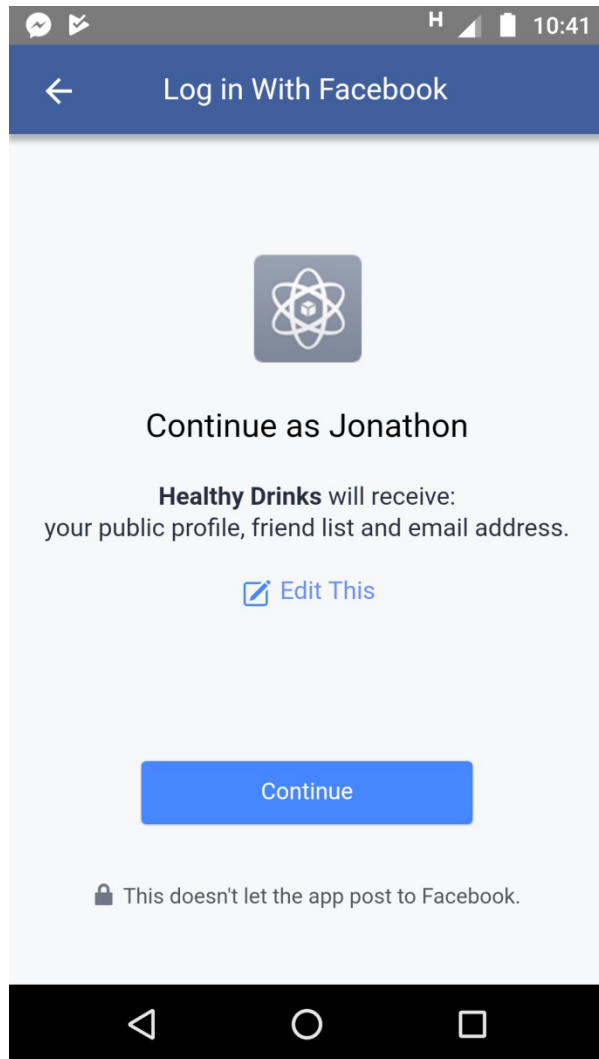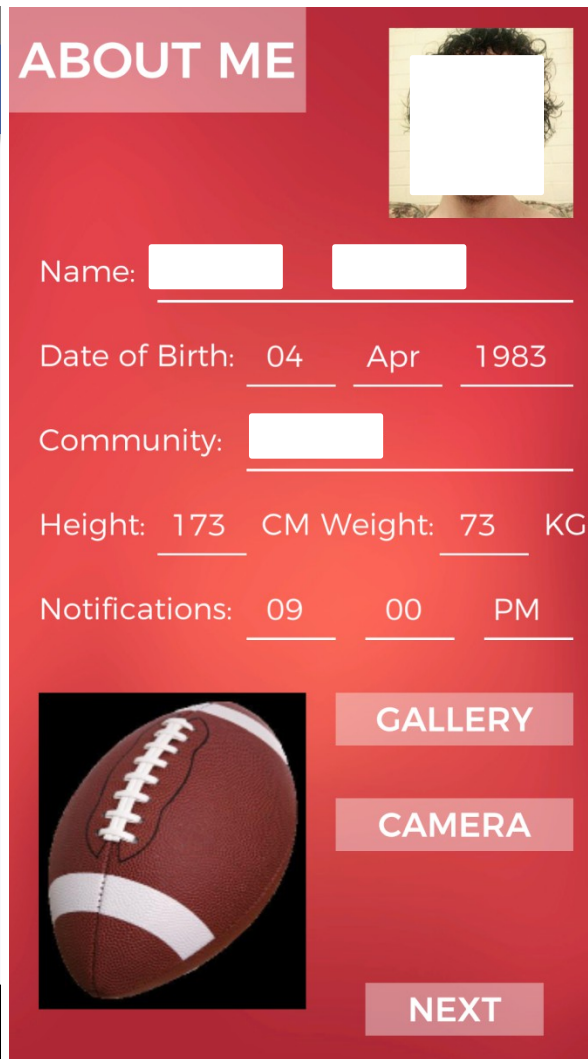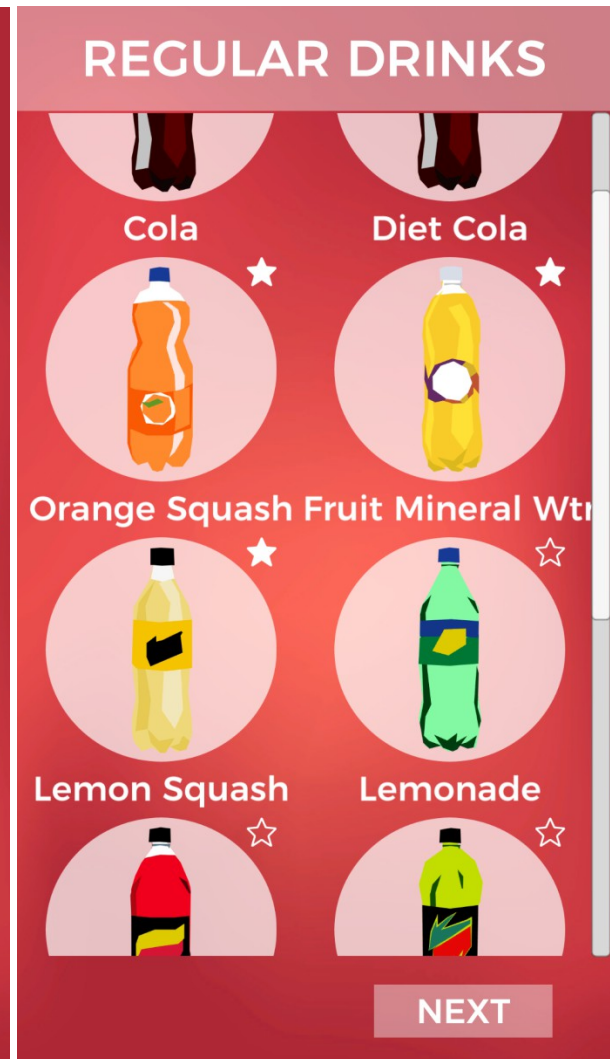

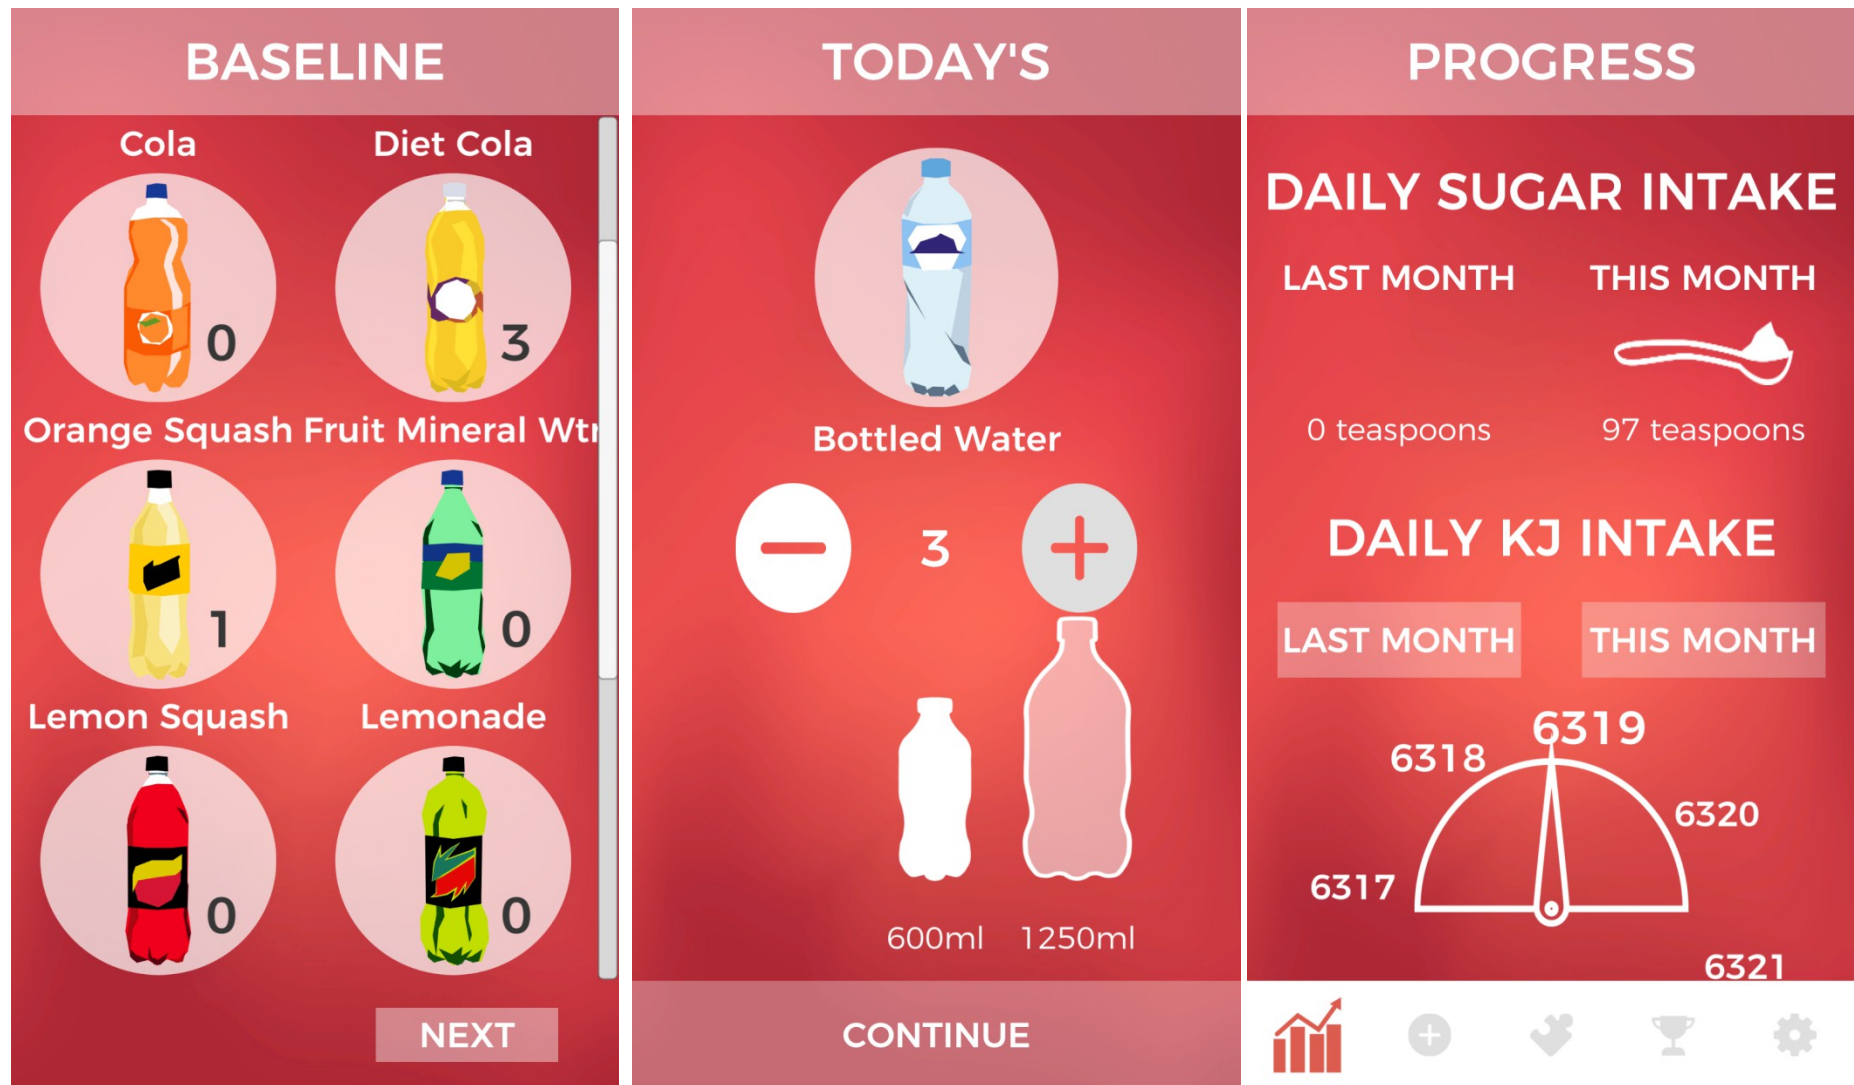

### QUIZ Score: 2 / 2



Citrus 1250ml

The Correct Answer Is...



28 42 56

### QUIZ Score: 2 / 3



Bottled Water 1250ml

The Correct Answer Is...



3 0 7

### CHALLENGES

SELECT YOUR CHALLENGE

-  Reduce the size of your soft drink
-  Try a new drink
-  Drink more water

CURRENT CHALLENGE

-  Reduce the size of your soft drink

I've done it!

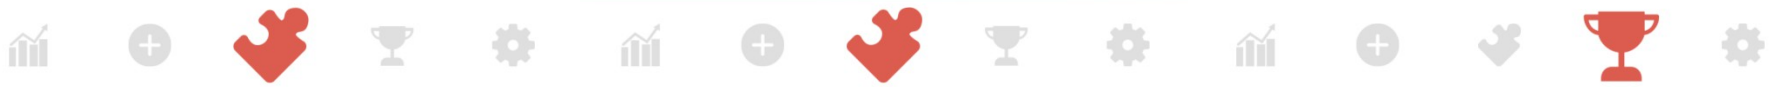

Supplement: mhealth_v5i12e192_app1.pdf [file mhealth_v5i12e192_app1.pdf]
